# Supplementary material for: Accurate determination of ultra-trace REEs in seawater using a membrane desolvation Q-ICP-MS coupled with an online automatic separation system
Source: Royal Society of Chemistry journal article supplement (doi:10.1039/d4ja00240g), 2024-01-01
Supplement: d4ja00240g1.pdf [file d4ja00240g1.pdf]

Fig. S1

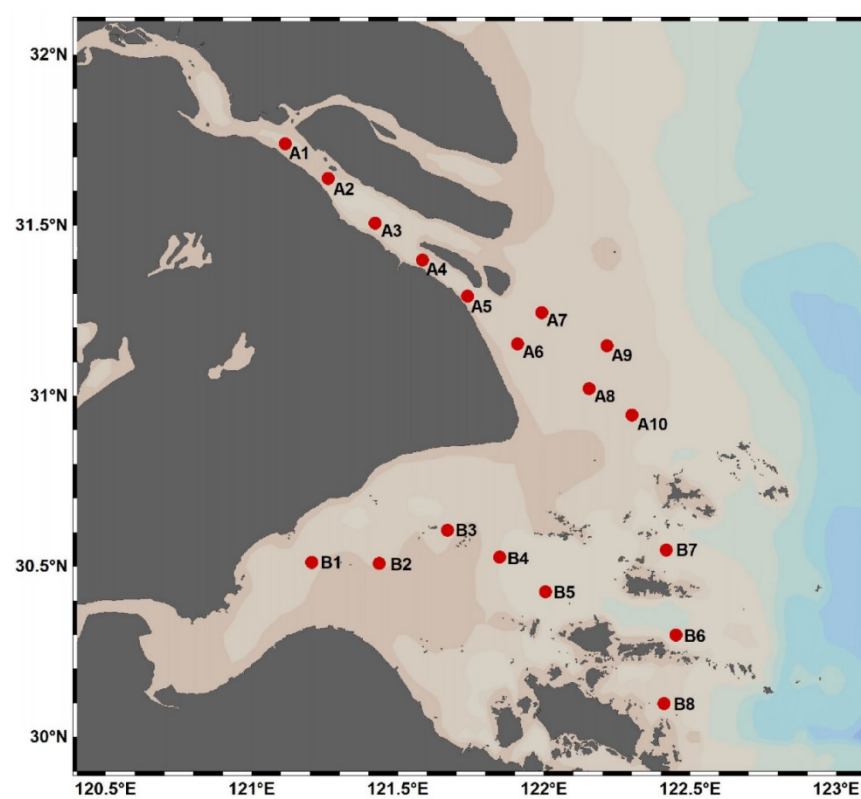

Fig. S1 Sampling stations from the Yangtze River Estuary and Hangzhou Bay from August 24 to 29, 2019.

Fig. S2

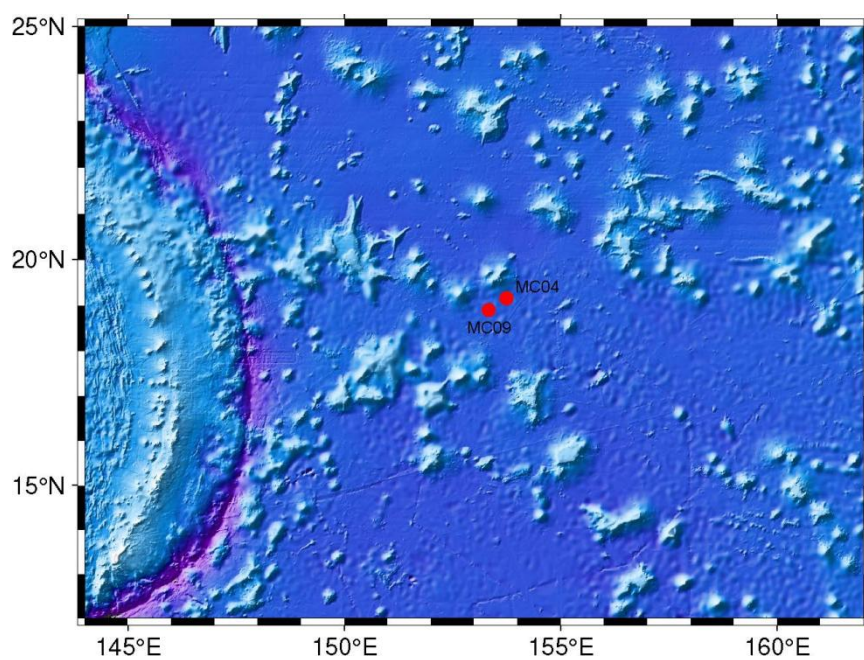

Fig. S2 Multi corer stations from the Pigafetta basin of the West Pacific on October 2023 during the 81thCruise by the Dayanghao.

Fig. S3

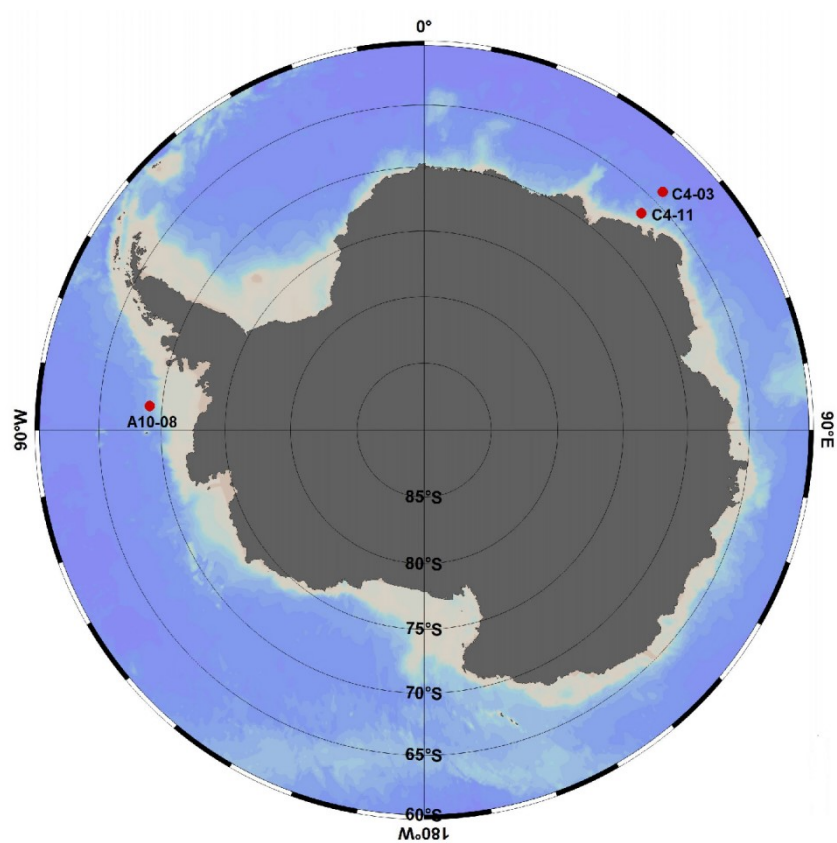

Fig. S3 CTD profiles from the regions around the Antarctic during 37th cruise by Xuelong 2 from November 10, 2020, to May 6, 2021.
