# Supplementary material for: Accurate determination of ultra-trace REEs in seawater using a membrane desolvation Q-ICP-MS coupled with an online automatic separation system
Source: Royal Society of Chemistry journal article supplement (doi:10.1039/d4ja00240g), 2024-01-01
Supplement: d4ja00240g2.xlsx [file d4ja00240g2.xlsx]

## Sheet: Table S1
Table S1 REE concentrations in triple-distilled HNO3 and ammonium acetate buffer solution.
	La	Ce	Pr	Nd	Sm	Eu	Gd	Tb	Dy	Ho	Er	Tm	Yb	Lu	Comment
	ng L-1	ng L-1	ng L-1	ng L-1	ng L-1	ng L-1	ng L-1	ng L-1	ng L-1	ng L-1	ng L-1	ng L-1	ng L-1	ng L-1
Triple-distilled HNO3-1	0.102033	0.0956563	＜0.01	＜0.01	＜0.01	＜0.01	＜0.01	＜0.01	＜0.01	＜0.01	＜0.01	＜0.01	＜0.01	＜0.01
Triple-distilled HNO3-2	0.0810334	0.162121	＜0.01	＜0.01	＜0.01	＜0.01	＜0.01	＜0.01	＜0.01	＜0.01	＜0.01	＜0.01	＜0.01	＜0.01
Triple-distilled HNO3-3	0.0264968	0.211895	＜0.01	＜0.01	＜0.01	＜0.01	＜0.01	＜0.01	＜0.01	＜0.01	＜0.01	＜0.01	＜0.01	＜0.01
average	0.0698545	0.156558	＜0.01	＜0.01	＜0.01	＜0.01	＜0.01	＜0.01	＜0.01	＜0.01	＜0.01	＜0.01	＜0.01	＜0.01
Ammonium acetate buffer-1	0.287576	0.354753	0.0438414	0.424419	0.0293894	＜0.01	＜0.01	＜0.01	＜0.01	＜0.01	＜0.01	＜0.01	＜0.01	＜0.01
Ammonium acetate buffer-2	0.352887	0.431722	0.0503973	0.329778	0.0389585	＜0.01	＜0.01	＜0.01	＜0.01	＜0.01	＜0.01	＜0.01	＜0.01	＜0.01
Ammonium acetate buffer-3	0.253271	0.214131	0.0259688	0.147012	0.0438597	＜0.01	＜0.01	＜0.01	＜0.01	＜0.01	＜0.01	＜0.01	＜0.01	＜0.01
average	0.297912	0.333535	0.0400692	0.300403	0.0374025	＜0.01	＜0.01	＜0.01	＜0.01	＜0.01	＜0.01	＜0.01	＜0.01	＜0.01
Fisher Optima Nitric acid	≤1	≤10	≤1	≤1	≤1	≤1	≤1	≤1	≤1	≤1	≤1	≤1	≤1	≤1	Specifications
	＜0.05	＜0.05	＜0.01	＜0.01	＜0.01	＜0.01	＜0.01	＜0.01	＜0.01	＜0.01	＜0.01	＜0.01	＜0.01	＜0.01	Test Value

## Sheet: Table S2
Table S2 REE analysis of a typical open-ocean seawater, NASS-7, CASS-6, and 10 ng L-1 artificial seawater standard.
	La	Ce	Pr	Nd	Sm	Eu	Gd	Tb	Dy	Ho	Er	Tm	Yb	Lu	Comment
	ng L-1	ng L-1	ng L-1	ng L-1	ng L-1	ng L-1	ng L-1	ng L-1	ng L-1	ng L-1	ng L-1	ng L-1	ng L-1	ng L-1
OSW-1	4.45955	0.825	0.593204	2.80485	0.502913	0.131068	0.764078	0.119417	0.992233	0.276699	1.02524	0.153398	1.08155	0.191262	standard addition method
OSW-2	4.41239	0.792233	0.586408	2.79223	0.497087	0.127184	0.785437	0.117476	0.972816	0.268932	1.0165	0.153398	1.09709	0.191262
OSW-3	4.47619	0.762136	0.597087	2.80874	0.520388	0.134951	0.783495	0.118447	0.986408	0.27767	1.04757	0.161165	1.11553	0.198058
OSW-4	4.31345	0.784466	0.572816	2.66505	0.517476	0.126214	0.765049	0.116505	0.965049	0.268932	1.00388	0.154369	1.0835	0.192233
OSW-5	4.50116	0.801942	0.593204	2.83883	0.515534	0.130097	0.786408	0.121359	0.991262	0.276699	1.01845	0.160194	1.13301	0.198058
OSW average	4.43255	0.793155	0.588544	2.78194	0.51068	0.129903	0.776893	0.118641	0.981553	0.273786	1.02233	0.156505	1.10214	0.194175
2*Standard Deviation(SD)	0.148089	0.0461502	0.0191929	0.135092	0.0202259	0.00691982	0.0226195	0.00373503	0.0240965	0.00889821	0.032171	0.00769383	0.0439239	0.00713444
OSW-6	4.68146	0.876699	0.621359	2.88155	0.537864	0.137864	0.824272	0.124272	1.01748	0.279612	1.05437	0.165049	1.16699	0.199029	External calibration curve method
OSW-7	4.60102	0.894175	0.613592	2.91456	0.531068	0.134951	0.83301	0.124272	1.0165	0.291262	1.06408	0.162136	1.15243	0.201942
OSW-8	4.61674	0.87767	0.600971	2.85922	0.515534	0.137864	0.816505	0.12233	0.998058	0.283495	1.03398	0.161165	1.10485	0.198058
OSW-9	4.58252	0.857282	0.606796	2.83398	0.523301	0.133981	0.813592	0.123301	1.02039	0.279612	1.02816	0.160194	1.13398	0.197087
OSW-10	4.61026	0.870874	0.616505	2.90097	0.526214	0.136893	0.823301	0.124272	1.01359	0.280583	1.06019	0.161165	1.13107	0.2
OSW average	4.6184	0.87534	0.611845	2.87806	0.526796	0.136311	0.822136	0.123689	1.0132	0.282913	1.04816	0.161942	1.13786	0.199223
2SD	0.0750659	0.0266097	0.0160943	0.0645554	0.0167374	0.00352736	0.0151282	0.00173675	0.0176154	0.00986285	0.0322178	0.00373503	0.0470248	0.00373503
NASS-7-1	9.49038	3.48562	1.37002	5.86916	1.1022	0.253226	1.4123	0.219123	1.51477	0.3943	1.26249	0.196979	1.24231	0.211728	External calibration curve method
NASS-7-2	9.61557	3.19193	1.36165	5.85097	1.0651	0.231892	1.40523	0.202898	1.5037	0.391165	1.28359	0.190593	1.24842	0.211249
NASS-7-3	9.12358	3.02126	1.29539	5.45876	0.996319	0.215313	1.29572	0.188954	1.40161	0.360673	1.17066	0.17453	1.15828	0.193944
NASS-7-4	10.194	3.35598	1.43204	6.07851	1.11644	0.238117	1.44412	0.209622	1.57055	0.398223	1.33432	0.192466	1.31008	0.212832
NASS-7-5	9.38875	3.09804	1.33678	5.73991	1.07513	0.232543	1.38963	0.200198	1.48924	0.378427	1.26878	0.184875	1.25132	0.201651
NASS-7-6	9.31521	3.08585	1.33308	5.71309	1.0166	0.221601	1.33356	0.191285	1.47255	0.369608	1.24425	0.177622	1.2392	0.201167
NASS-7-7	9.45143	3.04144	1.33492	5.48667	1.05696	0.236178	1.4148	0.213095	1.46712	0.382705	1.23519	0.181384	1.18591	0.197131
NASS-7 average	9.51127	3.18288	1.35198	5.74244	1.06125	0.232696	1.38505	0.203596	1.48851	0.382157	1.25704	0.185493	1.23365	0.204243
2SD	0.675636	0.35065	0.0852845	0.437832	0.0862455	0.0243437	0.103849	0.0222951	0.103006	0.0273247	0.0998272	0.0164512	0.0981089	0.0153127
Relative Deviation(RD,%)	-2.94624	-8.53806	-2.03026	-5.70708	0.117969	1.17209	-0.356031	0.790242	-1.42338	-3.00577	-3.30441	-0.805977	0.296342	0.612363
CASS-6-1	10	5.0497	1.44229	6.1112	1.15626	0.275655	1.80807	0.196028	1.37463	0.339581	1.15268	0.165689	1.23828	0.212768	External calibration curve method
CASS-6-2	10.0503	5.10921	1.49248	6.26631	1.15174	0.272799	1.83762	0.196391	1.4017	0.346733	1.15687	0.170722	1.2774	0.219033
CASS-6-3	9.92161	4.87205	1.37636	5.73816	1.06833	0.250455	1.71331	0.183496	1.30722	0.315846	1.07581	0.152837	1.16133	0.195577
CASS-6-4	9.85046	4.87056	1.38513	5.72846	1.06973	0.254551	1.7012	0.18084	1.26304	0.313875	1.05191	0.151904	1.13813	0.195367
CASS-6-5	10.0112	4.90973	1.39674	5.70862	1.06399	0.255067	1.69461	0.176966	1.29858	0.311152	1.0686	0.153727	1.14625	0.191312
CASS-6-6	10.3133	5.14212	1.43884	5.94573	1.12923	0.264948	1.80939	0.189248	1.33902	0.324965	1.11223	0.159358	1.21109	0.204493
CASS-6-7	10.3716	5.11573	1.50774	6.14551	1.20746	0.303562	1.93756	0.225931	1.43317	0.364576	1.17292	0.174355	1.25138	0.215064
CASS-6 average	10.0741	5.00987	1.43423	5.94914	1.12096	0.268148	1.78597	0.1927	1.34534	0.330961	1.113	0.161227	1.20341	0.204802
2SD	0.390721	0.243016	0.103437	0.459345	0.110708	0.0366187	0.177944	0.0328012	0.121659	0.040015	0.0972156	0.0182475	0.110605	0.0220224
RD(%)	-1.23467	-8.91142	-1.08787	-7.04465	-1.67007	-8.16849	-3.46122	-3.16581	-4.58598	-5.43968	-6.47033	-4.59922	-2.95104	-2.93735
10 ng L-1 standard-1	11.7216	11.6247	9.9283	10.149	10.0766	9.53068	10.8188	9.947	9.69679	9.89973	9.69788	9.39984	9.45238	9.38731	External calibration curve method
10 ng L-1 standard-2	11.4802	11.564	9.97654	10.1932	9.89407	9.43653	10.4668	9.79101	9.83829	9.92567	9.82888	9.63101	9.61739	9.62787
10 ng L-1 standard-3	11.5261	11.4942	10.0321	10.2551	10.0406	9.57844	10.7195	10.0017	9.86345	9.96518	9.81267	9.51755	9.62862	9.59002
10 ng L-1 standard-4	11.1278	11.1199	10.535	10.8214	10.6246	10.1435	11.3077	10.4622	10.2918	10.511	10.2977	10.0069	9.92664	10.0143
10 ng L-1 standard-5	11.6747	11.6273	10.2758	10.5799	10.2704	9.88613	10.8881	10.1954	10.0489	10.191	9.98512	9.80521	9.91568	9.79744
10 ng L-1 standard-6	11.2674	11.6713	10.6194	11.0483	10.8067	10.6318	11.1537	10.7984	10.7581	10.9734	10.7529	10.6136	10.8349	10.7639
10 ng L-1 standard-7	11.2007	11.3198	9.97772	10.4578	10.0604	9.6356	10.7038	10.0468	9.90816	10.0175	9.92139	9.65897	9.74809	9.72539
10 ng L-1 standard-8	10.7382	10.956	9.83203	10.2838	9.94087	9.63577	10.4296	9.93507	9.85097	9.98442	9.8207	9.62967	9.77959	9.72264
10 ng L-1 standard-9	11.2754	11.3897	10.1359	10.6238	10.2775	9.94196	10.8697	10.3362	10.2087	10.445	10.2237	9.9678	10.0669	10.0955
10 ng L-1 standard-10	10.0987	10.5494	9.54164	10.0419	9.78045	9.49058	10.0911	9.65817	9.69615	9.87025	9.68558	9.54466	9.7293	9.69522
10 ng L-1 standard average	11.2111	11.3316	10.0854	10.4454	10.1772	9.7911	10.7449	10.1172	10.0161	10.1783	10.0026	9.77752	9.86994	9.84196
Relative Standard Deviation(RSD,%)	4.33175	3.18248	3.19923	3.07999	3.19413	3.79127	3.30056	3.35138	3.26563	3.52629	3.3299	3.59249	3.87185	3.87837
REE reference values for calculation of Relative Deviation(RD,%) are from Ebeling et al.(2022).

## Sheet: Table S3
Table S3 REE analysis of the coastal water samples collected from the Yangze River Estuary and Hangzhou Bay.
Stations	Layer	Depth	Salinity	La	Ce	Pr	Nd	Sm	Eu	Gd	Tb	Dy	Ho	Er	Tm	Yb	Lu	∑REE	(La/Sm)SN	(La/Yb)SN	(Sm/Yb)SN	(LREE/MREE)SN	MREE/MREE*	(HREE/MREE)SN	Ce/Ce*	Gd/Gd*	Eu/Eu*
		m	‰	ng L-1	ng L-1	ng L-1	ng L-1	ng L-1	ng L-1	ng L-1	ng L-1	ng L-1	ng L-1	ng L-1	ng L-1	ng L-1	ng L-1	ng L-1
Water samples collected from the Yangze River Estuary
A1	Surface	2	0.148	30.166	50.4681	7.12537	27.3049	6.24636	1.30354	6.56868	0.789987	4.85915	0.925471	2.67498	0.371554	2.3575	0.357658	141.519	0.701651	0.944608	1.34626	0.75433	11.767	0.810014	0.794195	1.33579	0.952231
A2	Surface	2	0.148	25.1494	40.7711	5.92817	23.1357	5.31745	1.1234	5.98639	0.693809	4.07991	0.855465	2.52516	0.354358	2.26476	0.34405	118.529	0.687155	0.81977	1.19299	0.738078	10.8393	0.906968	0.770382	1.40128	0.927601
A3	Surface	2	0.148	24.526	40.5868	5.92954	23.0802	5.31773	1.14175	5.69962	0.679853	4.04644	0.844284	2.47263	0.345866	2.28981	0.353613	117.314	0.670084	0.790702	1.18	0.738354	10.8927	0.919109	0.776339	1.35194	0.969336
A4	Surface	2	0.149	22.9059	38.4761	5.47648	21.2235	4.85565	1.04525	5.32468	0.623447	3.74246	0.799743	2.3747	0.337498	2.21756	0.344276	109.747	0.685376	0.76253	1.11257	0.744301	10.8733	0.973686	0.792508	1.37934	0.959412
A5	Surface	2	0.162	30.2015	53.3615	7.2652	27.6133	6.23032	1.33894	7.24281	0.776746	4.58895	0.956678	2.84309	0.407067	2.74126	0.438812	146.006	0.704284	0.813325	1.15483	0.781528	11.5441	0.962639	0.831002	1.49042	0.92629
A6	Surface	2	0.161	9.90866	14.6306	2.39234	9.7832	2.39849	0.543664	4.78691	0.365934	2.42647	0.584086	1.95795	0.295049	2.05577	0.330771	52.4599	0.600216	0.355817	0.592815	0.575313	6.09717	1.56062	0.693171	2.23615	0.689865
A7	Surface	2	0.176	15.5716	24.6763	3.63344	14.3726	3.33524	0.728597	4.506	0.47574	2.97182	0.676605	2.15451	0.310183	2.03202	0.319154	75.7638	0.678321	0.565706	0.833979	0.671723	8.77414	1.20152	0.756918	1.58484	0.86055
A8	Surface	2	8.292	7.72451	6.76465	1.45293	6.42001	1.69511	0.415332	5.49619	0.358232	2.61549	0.673115	2.27015	0.319643	2.06337	0.327907	38.5966	0.66207	0.276363	0.417423	0.419056	3.5827	1.71667	0.463429	2.87047	0.517982
A9	Surface	2	3.883	8.11954	6.63248	1.45074	6.32496	1.59395	0.398379	3.4559	0.318629	2.28648	0.58667	1.98527	0.28542	1.79177	0.281774	35.512	0.740093	0.33453	0.45201	0.474494	4.45907	1.67662	0.442206	2.00115	0.717082
A10	Surface	2	11.889	7.62333	5.14183	1.29449	5.81126	1.51649	0.387417	3.35192	0.335409	2.51565	0.63942	2.1483	0.302015	1.95819	0.30497	33.3307	0.730358	0.287393	0.393496	0.416028	3.76902	1.72365	0.373209	1.89035	0.722833
A1	Bottom	8	0.148	25.5555	41.8458	6.02228	23.355	5.28869	1.12614	5.77811	0.681839	4.03834	0.82445	2.4202	0.336278	2.15568	0.328193	119.756	0.702047	0.875158	1.24658	0.756453	11.3421	0.872422	0.778229	1.37057	0.95102
A2	Bottom	14	0.148	21.3347	33.8949	4.99643	19.4826	4.50298	0.968417	5.19378	0.597859	3.60407	0.758076	2.2834	0.315655	2.06557	0.314065	100.313	0.688361	0.762488	1.10769	0.721812	10.3548	0.950428	0.757445	1.41931	0.931186
A3	Bottom	8	0.148	22.9189	38.1083	5.47607	21.3328	4.92806	1.04607	5.467	0.637305	3.79251	0.790462	2.34441	0.332508	2.13063	0.328196	109.633	0.67569	0.794094	1.17523	0.733405	10.815	0.925769	0.784744	1.38888	0.939866
A4	Bottom	5	0.149	23.4576	39.4941	5.63931	21.8517	4.96264	1.09093	5.48029	0.653376	3.90899	0.826345	2.48055	0.354652	2.31241	0.357801	112.871	0.686751	0.748866	1.09045	0.737229	10.7752	0.979965	0.792125	1.36643	0.975864
A5	Bottom	9	0.162	31.2663	55.7056	7.54758	28.7505	7.12096	1.38645	7.52448	0.805877	4.68806	0.966712	2.86961	0.417953	2.77185	0.432614	152.255	0.637922	0.832709	1.30534	0.758082	11.4739	0.906208	0.836476	1.4404	0.88603
A6	Bottom	5	0.161	20.378	37.3277	5.37692	20.7533	4.73651	1.0481	6.40367	0.617156	3.78243	0.809989	2.46361	0.353289	2.3923	0.375174	106.818	0.625075	0.628828	1.006	0.713537	9.75804	1.0521	0.82098	1.68433	0.871305
A7	Bottom	8	0.185	16.2025	25.683	3.80185	14.9878	3.44175	0.768826	4.67946	0.491996	3.08315	0.687105	2.19388	0.316242	2.03719	0.326226	78.7011	0.683963	0.587135	0.858431	0.677344	8.89554	1.17867	0.754996	1.59258	0.876526
A8	Bottom	4	19.026	10.382	5.54748	1.71921	7.65545	1.91904	0.495451	3.3742	0.428483	3.14473	0.788688	2.55009	0.346074	2.09806	0.308617	40.7576	0.786005	0.365299	0.464755	0.440588	4.19293	1.47089	0.298799	1.4929	0.857597
A9	Bottom	5	6.749	8.97469	7.23803	1.64127	7.16681	1.80479	0.452033	3.68509	0.368683	2.60533	0.656462	2.18095	0.299858	1.81141	0.270144	39.1555	0.722473	0.365754	0.506253	0.465481	4.57253	1.4774	0.432163	1.85433	0.750102
A10	Bottom	8	22.94	11.1	6.25752	1.97153	8.61242	2.09069	0.557936	3.42439	0.466912	3.37625	0.818771	2.57519	0.347087	2.03198	0.289425	43.9201	0.77137	0.403264	0.522789	0.451346	4.50657	1.3201	0.305971	1.39048	0.929526
Water samples collected from the Hangzhou Bay
B1	Surface	2	6.143	6.64571	2.88625	0.92353	4.3143	1.15145	0.291155	3.55189	0.268669	2.02357	0.545557	1.95962	0.29014	1.9923	0.329993	27.1741	0.838545	0.246247	0.29366	0.411183	3.01622	2.21383	0.260333	2.53197	0.556037
B2	Surface	2	7.716	5.07005	3.46206	1.0161	4.66116	1.20504	0.320747	3.39194	0.270937	1.96109	0.522289	1.84875	0.276576	1.80554	0.309264	26.1215	0.611282	0.207296	0.339117	0.390683	3.03787	2.06589	0.351039	2.37729	0.628541
B3	Surface	2	9.234	6.30489	5.17685	1.21573	5.34145	1.35733	0.327544	3.46312	0.276411	2.09444	0.531961	1.88416	0.278101	1.91545	0.315353	30.4828	0.674873	0.242992	0.360056	0.438705	3.6964	1.99597	0.429661	2.32254	0.614103
B4	Surface	2	12.686	5.86454	3.84193	1.05051	4.81634	1.21457	0.315688	3.1726	0.278591	2.12174	0.527701	1.8331	0.265481	1.87415	0.297642	27.4746	0.701524	0.231002	0.329285	0.401657	3.32847	1.94498	0.354252	2.17253	0.649812
B5	Surface	2	19.585	7.39295	5.0329	1.28386	5.87538	1.4979	0.393824	3.2346	0.352414	2.59794	0.647118	2.17565	0.315628	2.15527	0.354995	33.3104	0.717076	0.253222	0.353132	0.400091	3.62103	1.84598	0.373099	1.76116	0.756531
B6	Surface	2	24.087	10.9327	6.53505	1.85922	8.16371	2.00071	0.543295	3.54688	0.465262	3.29311	0.826077	2.65741	0.376799	2.36328	0.372817	43.9363	0.793913	0.341506	0.430155	0.442917	4.26636	1.57899	0.330541	1.45893	0.897007
B7	Surface	2	24.441	11.9979	8.27936	2.06508	8.97757	2.20976	0.575085	3.63255	0.489325	3.54119	0.870372	2.77009	0.383934	2.40914	0.371194	48.5725	0.78884	0.367644	0.466056	0.454822	4.64691	1.48826	0.37964	1.40462	0.904303
B8	Surface	2	26.343	20.1153	14.2286	2.76353	11.3589	2.68869	0.681149	4.1561	0.578524	4.05138	0.980447	3.11288	0.430162	2.71307	0.419154	68.2778	1.08696	0.547332	0.503543	0.559988	6.28095	1.42652	0.425828	1.34997	0.916496
B1	Bottom	5	6.146	4.44477	2.0445	0.844697	4.02953	1.08116	0.283624	3.474	0.26262	1.93581	0.526034	1.90519	0.288911	1.92215	0.331734	23.3747	0.597295	0.170706	0.285798	0.349128	2.3948	2.28027	0.242288	2.55641	0.558578
B2	Bottom	7	7.64	5.05862	3.22736	1.07635	4.90396	1.25943	0.348071	3.42502	0.28468	2.11162	0.56268	1.97305	0.2951	1.97434	0.335884	26.8362	0.583564	0.189146	0.324121	0.381461	2.88032	2.10767	0.318847	2.28743	0.670103
B3	Bottom	6	10.147	6.40352	3.92435	1.21609	5.47873	1.37236	0.356436	3.70023	0.301774	2.25436	0.577827	2.01361	0.292001	1.93449	0.309912	30.1357	0.677921	0.244364	0.360461	0.41736	3.31869	1.89721	0.32291	2.31616	0.633879
B4	Bottom	6	15.377	7.04783	4.28897	1.30259	5.84342	1.4627	0.367278	3.3599	0.331832	2.41459	0.594815	2.02374	0.282223	1.75026	0.268135	31.3383	0.700052	0.297261	0.424628	0.417468	3.69222	1.60299	0.324571	1.92672	0.690812
B5	Bottom	8	20.378	8.0336	4.53482	1.45652	6.5742	1.63259	0.426355	3.31416	0.377861	2.80142	0.694015	2.28056	0.315329	1.98857	0.311568	34.7416	0.714929	0.298232	0.41715	0.41217	3.72488	1.59551	0.303634	1.6767	0.785342
B6	Bottom	15	28.205	13.4891	7.96219	2.25486	9.88294	2.40843	0.629347	3.79281	0.532745	3.82125	0.932511	2.94994	0.404433	2.45383	0.379672	51.8941	0.813364	0.405747	0.498851	0.464157	4.70899	1.41619	0.328947	1.34579	0.932692
B7	Bottom	20	26.651	13.2262	8.11861	2.24062	9.78535	2.40346	0.624946	3.87016	0.538026	3.87437	0.936475	2.99543	0.411704	2.53563	0.38386	51.9448	0.799515	0.385065	0.481623	0.454306	4.60554	1.4326	0.339983	1.36452	0.915908
B8	Bottom	15	29.74	13.3929	7.64086	2.21814	9.71786	2.38991	0.625234	3.72671	0.55542	3.99781	0.978146	3.10082	0.418191	2.55189	0.388652	51.7025	0.814181	0.387433	0.475857	0.443691	4.50353	1.41581	0.31901	1.28389	0.941075
LREE=La+Pr+Nd, MREE=Sm+Tb+Dy, HREE=Tm+Yb+Lu;
MREE/MREE*=average(LaSN+CeSN+PrSN+NdSN)/(0.5×average(SmSN+EuSN+GdSN+TbSN+DySN+HoSN) + 0.5×average(ErSN+TmSN+YbSN+LuSN));
Ce/Ce*==CeSN/(0.5×LaSN + 0.5×PrSN);
Eu/Eu*==EuSN/(0.5×SmSN + 0.5×GdSN);
Gd/Gd*==GdSN/(0.33×SmSN + 0.66×TbSN);
SN means the element has been PAAS-normalized.

## Sheet: Table S4
Table S4 REE analysis of the marine sediment porewater samples collected from the West Pacific.
Stations	Loactions	Depth	La	Ce	Pr	Nd	Sm	Eu	Gd	Tb	Dy	Ho	Er	Tm	Yb	Lu	∑REE	(La/Sm)SN	(La/Yb)SN	(Sm/Yb)SN	(LREE/MREE)SN	MREE/MREE*	(HREE/MREE)SN	Ce/Ce*	Gd/Gd*	Eu/Eu*
		（cm）	ng L-1	ng L-1	ng L-1	ng L-1	ng L-1	ng L-1	ng L-1	ng L-1	ng L-1	ng L-1	ng L-1	ng L-1	ng L-1	ng L-1	ng L-1
MC04	The West Pacific(153.2709°E,18.8319°N)	Bottom water	2.054	0.492916	0.422649	1.80958	0.439664	0.120631	0.688125	0.125672	0.955379	0.292656	0.963975	0.172092	1.07969	0.200324	9.81737	0.67875	0.140439	0.206908	0.347781	0.485901	2.85025	0.121856	2.18882	0.9846
		0-2	3.89633	1.23835	0.551922	2.3677	0.511508	0.102798	0.628995	0.0960783	0.789425	0.218878	0.796401	0.114692	0.803239	0.145906	12.2622	1.10671	0.358093	0.323567	0.608731	0.315723	2.35078	0.18914	2.37673	0.838099
		2-6	2.98815	1.12619	0.360251	1.69909	0.299211	0.0583696	0.390215	0.0564754	0.545596	0.155586	0.594897	0.0837498	0.580555	0.103232	9.04156	1.45096	0.379966	0.261873	0.694752	0.266354	2.67427	0.237738	2.51169	0.785272
		6-8	3.26717	1.28162	0.380111	1.80397	0.313883	0.0546502	0.46009	0.059396	0.568393	0.173594	0.613631	0.0927183	0.629429	0.100822	9.79948	1.51228	0.383187	0.253383	0.713613	0.266032	2.68888	0.250448	2.81775	0.651722
		8-10	3.26919	0.899575	0.361653	1.69801	0.266024	0.0521851	0.420606	0.0593097	0.522825	0.155733	0.606017	0.083895	0.596783	0.100013	9.09182	1.78545	0.404398	0.226496	0.74755	0.258552	2.74998	0.178621	2.68795	0.699314
		10-13	3.1959	1.06548	0.365079	1.7018	0.277531	0.0518486	0.447882	0.0557748	0.55864	0.150625	0.590513	0.0824488	0.587946	0.0963748	9.22784	1.67306	0.401275	0.239844	0.7257	0.267568	2.62865	0.214153	2.96723	0.657114
		13-16	2.96738	1.10183	0.438602	1.8313	0.259361	0.0422888	0.352054	0.0441548	0.50225	0.131815	0.592236	0.0743808	0.530681	0.0842319	8.95256	1.66226	0.412787	0.248329	0.859188	0.233038	2.68299	0.217384	2.81668	0.640437
		16-19	3.17736	1.09574	0.397668	1.89485	0.290224	0.0434989	0.407678	0.0658751	0.560663	0.156228	0.656834	0.0832058	0.600355	0.100049	9.53023	1.59061	0.390701	0.24563	0.715812	0.253835	2.52485	0.21473	2.35553	0.5763
		19-29	2.46986	1.40495	0.278209	1.39259	0.223468	0.0379675	0.301535	0.0564643	0.399946	0.124979	0.51144	0.079523	0.46334	0.0915648	7.83584	1.60578	0.393513	0.245059	0.690792	0.228023	2.87971	0.367087	2.0818	0.669802
		29-34	2.77563	1.43294	0.314337	1.45181	0.223857	0.036045	0.327165	0.0365936	0.404917	0.130148	0.516043	0.0744662	0.511093	0.0879417	8.32298	1.80144	0.40091	0.22255	0.867639	0.215649	3.26303	0.332568	3.12121	0.603844
		34-39	2.62944	1.16962	0.329449	1.3657	0.216363	0.0259245	0.288281	0.0332264	0.397517	0.112356	0.497888	0.0650413	0.48738	0.0751497	7.69333	1.76567	0.398273	0.225565	0.877601	0.216259	3.03851	0.276865	2.97227	0.476051
MC09	The West Pacific(153.6799°E,19.0899°N)	Bottom water	3.28442	1.33506	0.572766	2.71085	0.558898	0.135464	0.840146	0.124041	1.03566	0.298381	0.973197	0.139168	0.952035	0.160874	13.121	0.8538	0.254678	0.298288	0.478607	0.393955	2.18299	0.222375	2.56446	0.892766
		0-3	4.35651	1.16901	0.67911	2.79856	0.536996	0.114016	0.729261	0.113196	0.928161	0.256085	0.972928	0.134899	0.970531	0.169509	13.9288	1.17868	0.331371	0.281137	0.619736	0.317329	2.42159	0.153817	2.40916	0.833727
		3-6	3.29659	2.51149	0.465488	2.01156	0.365724	0.0699767	0.508429	0.0734109	0.600232	0.174805	0.738606	0.0980189	0.713278	0.107647	11.7353	1.30961	0.341187	0.260526	0.68635	0.240388	2.57292	0.453927	2.55837	0.740489
		6-9	2.98773	2.03329	0.372244	1.51355	0.318591	0.0617544	0.395625	0.061043	0.513458	0.154231	0.599764	0.0881237	0.654959	0.106808	9.86117	1.3625	0.336754	0.247158	0.670845	0.240086	2.83155	0.424423	2.36537	0.803644
		9-12	2.93299	2.86298	0.398455	1.69328	0.299213	0.0685305	0.351011	0.0531297	0.494823	0.146155	0.563263	0.0817122	0.608942	0.104535	10.659	1.42416	0.355567	0.249667	0.7528	0.20374	2.88722	0.590084	2.36194	0.981984
		12-15	2.68721	2.91782	0.36143	1.51397	0.25508	0.0536501	0.360489	0.0509158	0.387787	0.127335	0.49589	0.0734406	0.547749	0.0853359	9.9181	1.53057	0.362164	0.23662	0.80131	0.189686	2.94266	0.658819	2.61163	0.805652
		15-18	2.9348	1.98987	0.350466	1.37835	0.222683	0.0528436	0.348753	0.057311	0.36202	0.125725	0.44195	0.0769764	0.434848	0.0780004	8.85459	1.91478	0.498225	0.260199	0.820668	0.202871	2.73808	0.429091	2.3815	0.851219
LREE=La+Pr+Nd, MREE=Sm+Tb+Dy, HREE=Tm+Yb+Lu;
MREE/MREE*=average(LaSN+CeSN+PrSN+NdSN)/(0.5×average(SmSN+EuSN+GdSN+TbSN+DySN+HoSN) + 0.5×average(ErSN+TmSN+YbSN+LuSN));
Ce/Ce*==CeSN/(0.5×LaSN + 0.5×PrSN);
Eu/Eu*==EuSN/(0.5×SmSN + 0.5×GdSN);
Gd/Gd*==GdSN/(0.33×SmSN + 0.66×TbSN);
SN means the element has been PAAS-normalized.

## Sheet: Table S5
Table S5 REE analysis of the open-ocean seawater samples collected from the regions around the Antarctic.
Samples	Depth	Locations	La	Ce	Pr	Nd	Sm	Eu	Gd	Tb	Dy	Ho	Er	Tm	Yb	Lu	∑REE	(La/Yb)SN	(La/Sm)SN	(Sm/Yb)SN	(LREE/MREE)SN	MREE/MREE*	(HREE/MREE)SN	(HREE/LREE)SN	Ce/Ce*	Gd/Gd*	Eu/Eu*
	（m）		ng L-1	ng L-1	ng L-1	ng L-1	ng L-1	ng L-1	ng L-1	ng L-1	ng L-1	ng L-1	ng L-1	ng L-1	ng L-1	ng L-1	ng L-1
A10-08	0	Antarctic Peninsula(84.9949°W, 69.0201°S)	3.79002	0.748135	0.522943	2.38095	0.45133	0.112679	0.675936	0.0991155	0.800695	0.23658	0.821051	0.125224	0.845417	0.142721	11.7528	0.330945	1.22005	0.271256	0.601035	0.337915	2.46697	4.10453	0.118641	2.57562	0.921784
	25		4.33338	0.856375	0.637335	3.02552	0.594352	0.150586	0.885382	0.135517	1.05954	0.302865	1.04807	0.16655	1.1697	0.197697	14.5629	0.273487	1.05928	0.258181	0.540464	0.364768	2.52194	4.66626	0.115921	2.48934	0.938661
	50		4.25472	0.998575	0.601158	2.54126	0.517349	0.13463	0.781156	0.11761	0.951976	0.24903	0.902953	0.146309	0.949055	0.171309	13.3171	0.330952	1.19486	0.27698	0.567177	0.347268	2.43754	4.29767	0.139806	2.52895	0.955795
	75		3.997	0.968933	0.571966	2.57294	0.467745	0.121793	0.725039	0.113126	0.875914	0.250664	0.887971	0.142989	0.974176	0.170544	12.8408	0.302888	1.24152	0.243965	0.587425	0.331084	2.61587	4.45311	0.143706	2.47481	0.940288
	100		4.23329	0.902082	0.550521	2.54943	0.488735	0.130662	0.739953	0.120233	0.902372	0.254037	0.905815	0.147366	1.00877	0.175854	13.1091	0.309792	1.25844	0.246171	0.569376	0.335588	2.58523	4.54047	0.130888	2.38533	0.98022
	150		3.80603	0.646409	0.479347	2.08371	0.414728	0.10947	0.656571	0.0998537	0.828653	0.22799	0.795745	0.124383	0.898578	0.163803	11.3353	0.312681	1.33333	0.234511	0.565619	0.346339	2.63672	4.66166	0.105518	2.53645	0.94018
	200		3.54063	0.604863	0.448611	2.1338	0.398059	0.103848	0.643005	0.100826	0.802452	0.227701	0.800516	0.136337	0.896608	0.169564	11.0068	0.291517	1.2923	0.22558	0.552777	0.34756	2.80138	5.06784	0.105912	2.48739	0.917049
	300		3.91015	0.82269	0.502989	2.30916	0.429919	0.117224	0.734986	0.108547	0.893449	0.245706	0.877299	0.14034	1.00711	0.178921	12.2785	0.286618	1.32141	0.216904	0.556616	0.346007	2.7333	4.91056	0.12974	2.63915	0.923023
	500		4.27524	0.866456	0.576539	2.50524	0.50112	0.127968	0.736339	0.114964	0.899864	0.248005	0.890163	0.140294	1.00846	0.174427	13.0651	0.312958	1.23951	0.252486	0.582486	0.335768	2.56749	4.4078	0.12285	2.44388	0.954387
	1000		5.03222	0.779183	0.68975	3.01986	0.586229	0.148154	0.923979	0.135422	1.08075	0.293797	1.07058	0.16278	1.18616	0.202823	15.3117	0.313185	1.24716	0.251119	0.584395	0.347881	2.52379	4.31863	0.0932936	2.60752	0.902779
	2000		6.38764	0.622149	0.878881	3.96335	0.776753	0.196784	1.14804	0.171847	1.32879	0.379417	1.26253	0.19639	1.43437	0.246514	18.9935	0.328748	1.19478	0.275154	0.593988	0.355894	2.41965	4.07356	0.0586014	2.52753	0.943309
	3000		5.95024	0.64878	0.905476	4.2064	0.845887	0.200105	1.12947	0.1772	1.30023	0.350383	1.22396	0.189631	1.41183	0.244622	18.7842	0.311127	1.022	0.304429	0.580106	0.36112	2.32687	4.01111	0.0631061	2.3799	0.938641
	3211		5.72152	0.600294	0.852648	3.79218	0.748713	0.185329	1.06259	0.161503	1.25054	0.323422	1.05462	0.169013	1.21793	0.212588	17.3529	0.346796	1.11026	0.312355	0.586477	0.365333	2.19422	3.74136	0.0612273	2.47421	0.945651
C4-03	0	Prydz Bay(45.0248°E,64.0000°S)	4.81258	0.662221	0.5152	2.38216	0.46525	0.11784	0.693212	0.105165	0.855838	0.245932	0.882164	0.135364	0.921005	0.168404	12.9623	0.385746	1.50287	0.256673	0.632435	0.31596	2.60762	4.12314	0.0902658	2.5065	0.938242
	25		3.8256	0.505432	0.472103	2.2537	0.406931	0.111599	0.650471	0.096853	0.815457	0.242943	0.834063	0.127845	0.871417	0.148426	11.3628	0.324085	1.36587	0.237274	0.590542	0.342864	2.59585	4.39571	0.082671	2.58409	0.970677
	50		3.7759	0.493312	0.489632	2.16422	0.411157	0.111142	0.649266	0.0990809	0.797066	0.23372	0.803091	0.128634	0.893752	0.152546	11.2025	0.311881	1.33426	0.233747	0.585751	0.344742	2.64992	4.52397	0.0803309	2.52829	0.964432
	75		4.0676	0.682046	0.525038	2.31378	0.435748	0.122254	0.722083	0.107745	0.909426	0.260868	0.883427	0.145882	1.00153	0.177085	12.3545	0.29982	1.35623	0.22107	0.56838	0.348173	2.72868	4.8008	0.10327	2.60039	0.969719
	100		3.71853	0.544012	0.448655	2.01253	0.395497	0.10642	0.638726	0.0954395	0.764721	0.228392	0.844039	0.125764	0.931674	0.161966	11.0164	0.294641	1.36602	0.215693	0.579716	0.33825	2.83534	4.89091	0.0922597	2.58294	0.945987
	150		4.09044	0.710721	0.519498	2.41719	0.444217	0.122693	0.736609	0.107111	0.878045	0.25274	0.908698	0.139892	1.00542	0.179517	12.5128	0.300336	1.33784	0.224493	0.584216	0.339828	2.7498	4.70682	0.107631	2.6537	0.954221
	200		4.06558	0.827055	0.540798	2.48205	0.470624	0.128454	0.722717	0.116814	0.937177	0.258452	0.960146	0.144996	1.06649	0.184303	12.9056	0.281419	1.2551	0.22422	0.552539	0.341951	2.66496	4.82311	0.123932	2.40261	0.991626
	300		4.05652	0.695372	0.529918	2.53032	0.466277	0.121616	0.748	0.110573	0.886569	0.257061	0.902166	0.142854	0.988803	0.185031	12.6211	0.302851	1.26398	0.239602	0.578524	0.34428	2.71598	4.69466	0.105121	2.6007	0.921017
	500		4.52443	0.657989	0.65169	2.87242	0.543348	0.144343	0.830039	0.124239	1.01661	0.290026	0.993405	0.160071	1.10344	0.197195	14.1093	0.302691	1.2098	0.250198	0.582324	0.352263	2.6111	4.48393	0.0859966	2.54726	0.968413
	1000		4.93985	0.6724	0.678116	3.08497	0.607475	0.158259	0.886518	0.13322	1.05715	0.295231	1.04704	0.157377	1.18842	0.206744	15.1128	0.306853	1.18145	0.259726	0.585491	0.349381	2.5371	4.33328	0.0819674	2.51241	0.977899
	2000		5.75469	0.702868	0.830882	3.84861	0.70151	0.178029	1.04857	0.153484	1.21437	0.335017	1.17522	0.180271	1.29451	0.233656	17.6517	0.328172	1.19184	0.275349	0.613291	0.345297	2.47147	4.02984	0.072157	2.5779	0.938163
	3000		5.92742	0.795296	0.880853	3.88906	0.761944	0.192476	1.03225	0.167362	1.24564	0.337382	1.13135	0.178864	1.32507	0.231382	18.0963	0.330228	1.13024	0.292174	0.596513	0.347004	2.33329	3.91155	0.0783851	2.32952	0.993417
	4413		6.43457	1.40714	0.956544	4.37429	0.847769	0.196508	1.11657	0.164679	1.28471	0.339737	1.15036	0.181991	1.31483	0.225122	19.9948	0.361274	1.10274	0.327615	0.63405	0.328244	2.24292	3.53745	0.127741	2.4835	0.927479
C4-11	0	Cosmonaut Sea(45.0397°E,66.4810°S)	3.88231	0.529283	0.467354	2.12512	0.392392	0.105671	0.625083	0.0914948	0.750261	0.22904	0.765478	0.120778	0.831617	0.145351	11.0612	0.34463	1.43748	0.239747	0.622086	0.329893	2.65961	4.27531	0.0860418	2.6165	0.955319
	25		3.80203	1.22666	0.559546	2.36739	0.430952	0.110877	0.665878	0.102485	0.790209	0.243408	0.806197	0.129289	0.866198	0.159625	12.2607	0.32403	1.28179	0.252794	0.614222	0.315125	2.62609	4.27547	0.189201	2.49945	0.931018
	50		3.967	0.713592	0.537072	2.36587	0.421877	0.115013	0.687079	0.105121	0.836707	0.247808	0.878966	0.140843	0.944625	0.169098	12.1307	0.310019	1.36617	0.226925	0.60024	0.331184	2.74763	4.57756	0.10888	2.54033	0.953149
	75		4.1381	0.705433	0.547668	2.39645	0.469546	0.115844	0.688052	0.109213	0.936313	0.258696	0.933893	0.145135	1.00469	0.177268	12.6263	0.304057	1.28042	0.237466	0.56613	0.342025	2.63996	4.66318	0.104047	2.41146	0.923675
	100		3.57471	0.65417	0.491343	2.2076	0.42591	0.108371	0.651149	0.104857	0.815556	0.230961	0.843702	0.132297	0.917558	0.162509	11.3207	0.287603	1.21942	0.235852	0.554609	0.346814	2.65822	4.79296	0.110146	2.40726	0.927082
	150		4.11106	0.736475	0.519831	2.46002	0.457415	0.120551	0.741602	0.112592	0.902795	0.258641	0.922946	0.141677	1.00384	0.177492	12.6669	0.302325	1.30579	0.231527	0.568116	0.343295	2.65145	4.66709	0.111144	2.5532	0.924175
	200		4.30991	0.807011	0.568088	2.65963	0.498617	0.125685	0.78939	0.114871	0.927296	0.264657	0.977808	0.147394	1.07883	0.184987	13.4542	0.294918	1.25583	0.234839	0.585748	0.337942	2.6896	4.59173	0.114453	2.62461	0.897826
	500		4.96053	0.866097	0.621528	2.81488	0.563489	0.132941	0.795013	0.12132	0.91456	0.271013	0.897756	0.145283	0.974241	0.179413	14.2581	0.375878	1.27901	0.293883	0.624388	0.325585	2.46543	3.94856	0.108673	2.46318	0.90466
	1000		5.23074	0.761763	0.715438	3.17653	0.61562	0.151326	0.886725	0.134169	0.983585	0.278152	0.98267	0.143105	1.09341	0.187256	15.3405	0.353155	1.23447	0.286078	0.630329	0.330822	2.37351	3.7655	0.0878157	2.49152	0.930369
	1995		6.43203	1.40643	0.838138	3.68783	0.686471	0.174422	1.02668	0.147054	1.12694	0.30259	1.05701	0.159556	1.14375	0.204048	18.3929	0.415147	1.3613	0.304963	0.671047	0.309394	2.29186	3.41535	0.134211	2.62107	0.938951
LREE=La+Pr+Nd, MREE=Sm+Tb+Dy, HREE=Tm+Yb+Lu;
MREE/MREE*=average(LaSN+CeSN+PrSN+NdSN)/(0.5×average(SmSN+EuSN+GdSN+TbSN+DySN+HoSN) + 0.5×average(ErSN+TmSN+YbSN+LuSN));
Ce/Ce*==CeSN/(0.5×LaSN + 0.5×PrSN);
Eu/Eu*==EuSN/(0.5×SmSN + 0.5×GdSN);
Gd/Gd*==GdSN/(0.33×SmSN + 0.66×TbSN);
SN means the element has been PAAS-normalized.
